# Supplementary material for: Spermidine-induced recovery of human dermal structure and barrier function by skin microbiome
Source: PubMed Central journal article supplement (PMC7895926; doi:10.1038/s42003-020-01619-4), 2021-02-19
Supplement: 42003_2020_1619_MOESM2_ESM.pdf [file 42003_2020_1619_MOESM2_ESM.pdf]

## Description of Additional Supplementary Files

Supplementary Data 1: Source data underlying plots shown in figures.
